# Supplementary material
Source: publisher site journal article supplement (https://natureconservation.pensoft.net/article/86352/download/suppl/31/)
Supplement: Supplementary file 1

SUPPLEMENTARY INFORMATION

**Seeking serpents: Ball python trade in Benin, West Africa**

A. S. Christian Toudonou, Angie Elwin, Johannes Penner, Emma Coulthard, John Norrey, David Megson, Mark-Oliver Rödel, Brice Sinsin, Lauren A. Harrington, Mark Auliya, Neil D’Cruze.

**Ball Python Trade Questionnaire, Benin**

SECTION 1: DEMOGRAPHIC INFORMATION

Q1 - Province of residence:

Q2 - Age:

Q3 - Ethnic group:

Q4 - Religion:

Q5 - Gender:

Q6 - Marital status:

Q7 - Education level:

Q8 - Primary profession:

Q9 - Social status:

Q10 - Place as income generator in household:

SECTION 2: BALL PYTHON TRADE (GENERAL)

Q1 - Position in the Ball python trade:

Q2 - How did you get into the ball python trade?

Q3 - What do ball pythons represent to you?

Q4 - Do you purchase ball pythons?

Q5 - Do you hunt ball pythons?

Q6 - Do you sell ball python specimens in markets?

Q7 - Do you sell ball python specimens to other actors?

Q8 - Is the ball python trade profitable for you?

Q9 - What difficulties do you encounter trading ball pythons?

Q10 - Are ball pythons as common as in the past in the wild (30-40 years ago)? [Y/N]

Q11a- How abundant are ball pythons in the wild compared to 5 years ago? [much higher/a few higher/no change/ a few less/much less]

Q11b - Why?

Q12 - Is your role in the ball python trade regulated?

SECTION 3: BALL PYTHON BUYING

Q1 - How often do you buy ball pythons? [frequency per year]

Q2 - How many do you buy per time?

Q3 - What price to you pay per specimen? [range]

Q4 - How long have you been buying ball pythons [in years]?

SECTION 4: BALL PYTHON HUNTING

Q1 - What region of Benin to you hunt ball pythons?

Q2 - How often do you hunt ball pythons? [frequency per year]

Q3 - How many do you collect each time you hunt?

Q4 - How long have you been hunting ball pythons? [in years]

Q5 - Where do you hunt ball pythons [e.g. which habitat]?

SECTION 5: BALL PYTHON SALES AT MARKETS

Q1 - Where [geographically] do you sell ball pythons at markets?

Q2 - How often do you sell ball pythons at markets? [frequency per year]

Q3 - How many ball pythons do you sell in a typical day at markets?

Q4 - What price do you sell specimens for at markets?

Q5 - How long have you been selling ball pythons at markets?

Q6 - What is the origin [country] of the customer?

Q7 - What is the nature of the customer?

SECTION 6: SELLING BALL PYTHONS TO OTHER BUYERS (NOT AT MARKETS)

Q1 - Where [geographically] do you sell ball pythons to other buyers?

Q2 - How often do you sell ball pythons to other buyers? [frequency per year]

Q3 - How many ball pythons do you sell in a typical day to other buyers?

Q4 - What price do you sell specimens for to other buyers?

Q5 - How long have you been selling ball pythons to other buyers?
